# Supplementary material for: Intestinal transit-amplifying cells require METTL3 for growth factor signaling and cell survival
Source: JCI journal article supplement (doi:10.1172/jci.insight.171657), 2023-10-26

957  
958  
959  
960  
961  
962

Supplementary Materials for  
**Intestinal transit amplifying cells require METTL3 for growth factor signaling and cell survival**  
Charles H. Danan et al.

963  
964  
965  
966  
967  
968  
969

\*Corresponding author. Email: hamiltonk1@chop.edu

970  
971  
972  
973  
974  
975  
976

**This PDF file includes:**

Supplemental Figures 1-9  
Supplemental Tables 1-4

**Other Supplementary Materials for this manuscript include the following:**

Supplemental Data 1-3

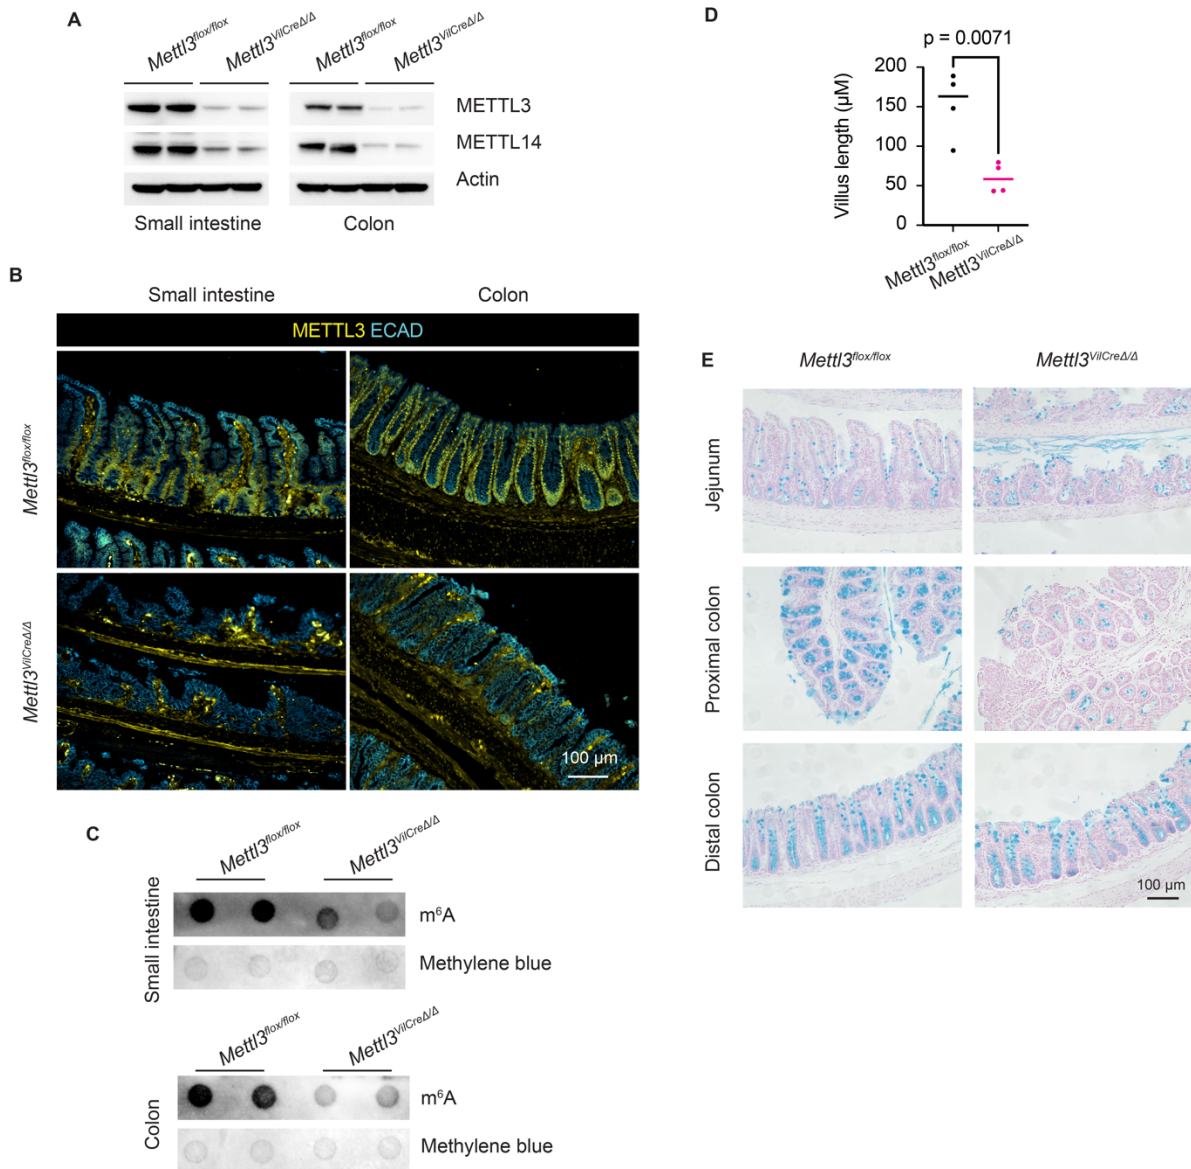

977  
978  
979  
980  
981  
982  
983  
984  
985

**Supplemental Figure 1. Validation and additional characterization of *Mettl3<sup>VilCreΔΔ</sup>* mice. (A)** Western blot for METTL3 and METTL14 in epithelial crypt enriched lysates from distal half of small intestine and colon. **(B)** Immunofluorescent staining of METTL3 in jejunum. **(C)** m<sup>6</sup>A dot blot in isolated crypts of distal half of small intestine and colon. **(D)** Quantification of shortest villus lengths in three representative jejunal sections in *Mettl3<sup>flx/flx</sup>* (n=4) and *Mettl3<sup>VilCreΔΔ</sup>* (n=4) mice. Bar at median value. P denotes value of unpaired parametric Student's t test. **(E)** Representative Alcian blue staining in small intestine and colon. All data from postnatal day 29.

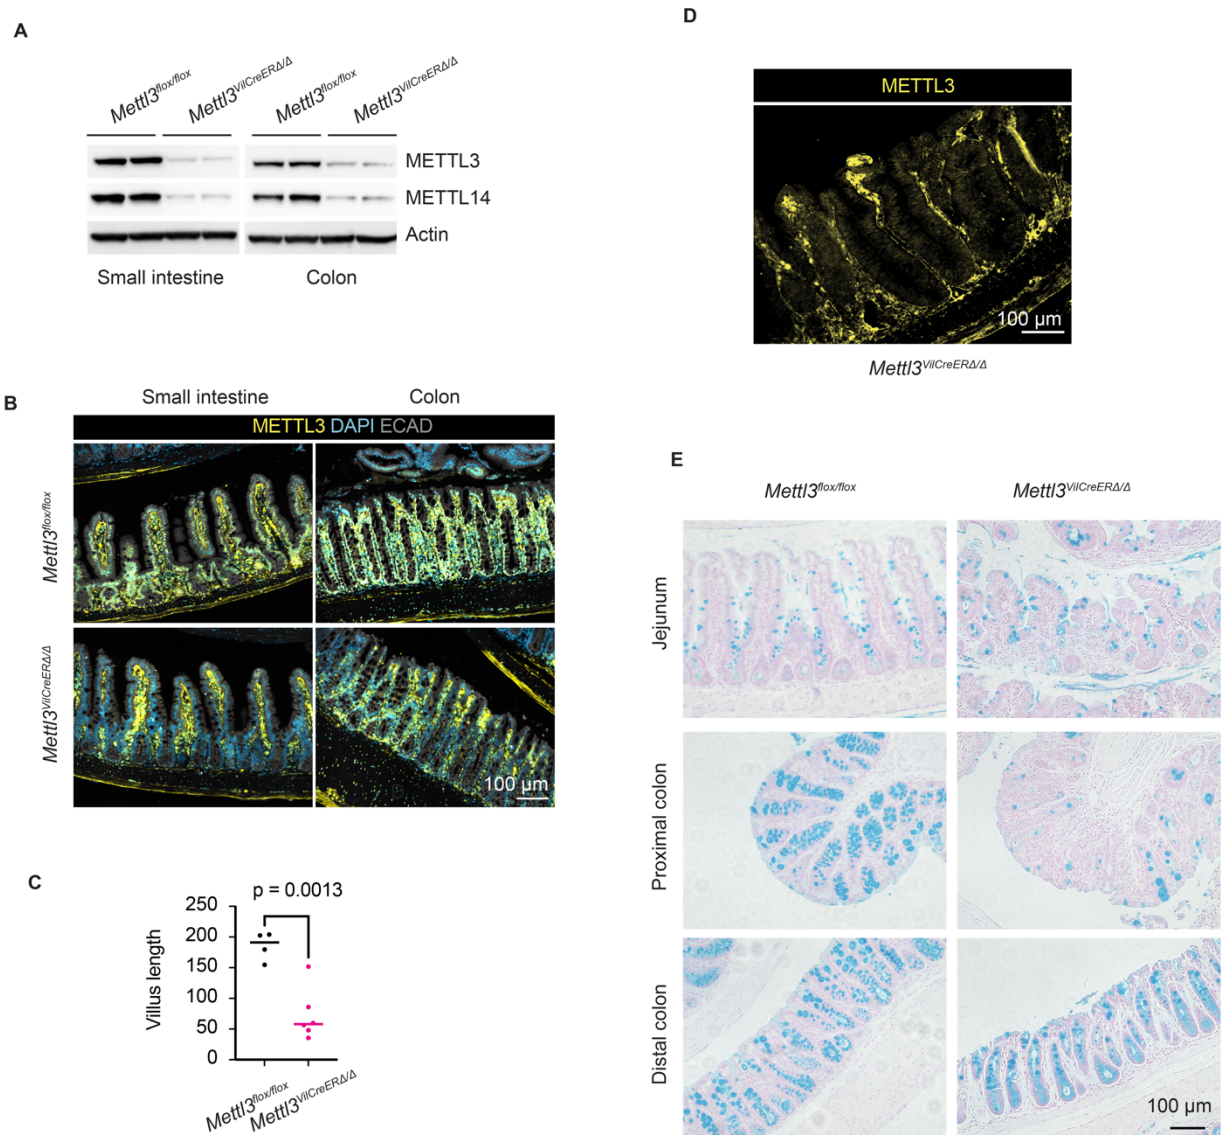

986  
 987 **Supplemental Figure 2. Validation and additional characterization of inducible *Mettl3<sup>VilCreERΔ/Δ</sup>* mice.**  
 988 **(A)** Western blot for METTL3 and METTL14 in epithelial crypt enriched lysates from distal half of small  
 989 intestine and colon in mice two days post final tamoxifen injection. **(B)** Immunofluorescent staining of  
 990 METTL3 in jejunum and colon two days post final tamoxifen injection. **(C)** Quantification of shortest villus  
 991 lengths in three representative jejunal sections in *Mettl3<sup>lox/lox</sup>* (n=4) and *Mettl3<sup>VilCreERΔ/Δ</sup>* (n=6) mice. Bar at  
 992 median value. P denotes value of unpaired parametric Student's t test. **(D)** METTL3 staining in hypertrophic  
 993 small intestinal crypts in a *Mettl3<sup>VilCreERΔ/Δ</sup>* mouse nine days post final tamoxifen injection. **(E)** Representative  
 994 Alcian blue staining nine days post final tamoxifen injection.  
 995

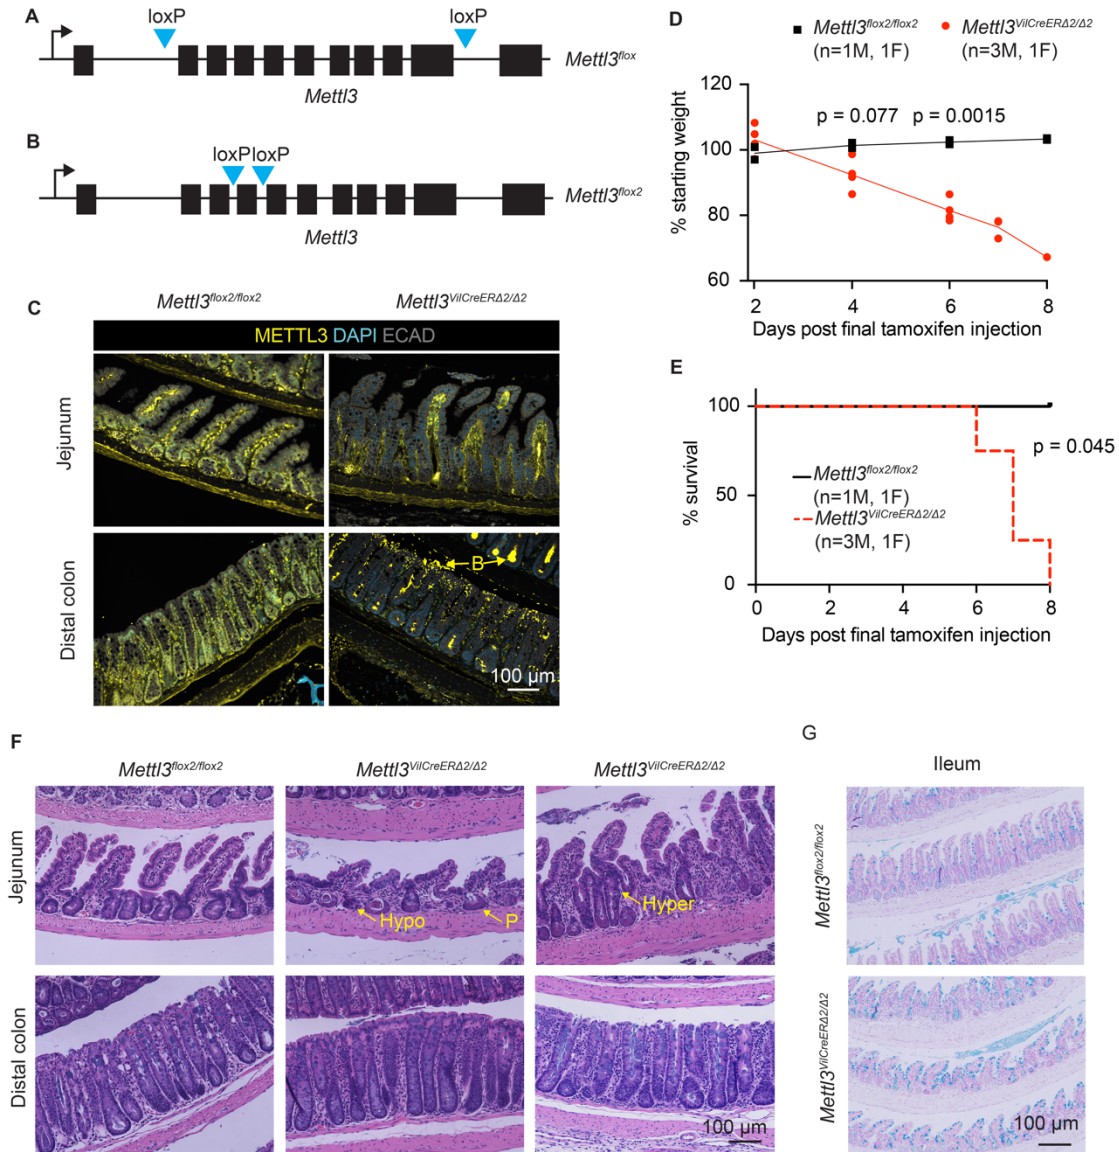

996  
 997 **Supplemental Figure 3. A second *Mettl3* deletion model recapitulates intestinal phenotypes. (A, B)**  
 998 **Schematic depicting *loxP* sites in the *Mettl3* gene. (C) METTL3 staining in jejunum and distal colon. “B”**  
 999 **indicates presumed off-target luminal bacterial staining with anti-METTL3 antibody. (D) Weight loss post**  
 1000 **final tamoxifen injection in *Mettl3<sup>fllox2/fllox2</sup>* (n=2) and *Mettl3<sup>VilCreERΔ2/Δ2</sup>* (n=4) mice. Each individual point**  
 1001 **represents one mouse. P denotes value of unpaired parametric Student’s t test at days 4 and 6. (E) Kaplan-**  
 1002 **Meier survival curve post final tamoxifen injection in *Mettl3<sup>fllox2/fllox2</sup>* (n=2) and *Mettl3<sup>VilCreERΔ2/Δ2</sup>* (n=4) mice. P**  
 1003 **value corresponds to Log-rank (Mantel-Cox). (F) Representative H&E images from small intestine and**  
 1004 **colon. “Hypo” indicates hypoplastic crypts. “Hyper” indicates hyperplastic crypts. “P” indicates crypts**  
 1005 **dominated by Paneth cell granules. (G) Representative Alcian blue staining of ileum. Images from areas of**  
 1006 **most severe histological distortion in distal small intestine of mice meeting euthanasia criteria or littermate,**  
 1007 **tamoxifen-injected controls.**  
 1008

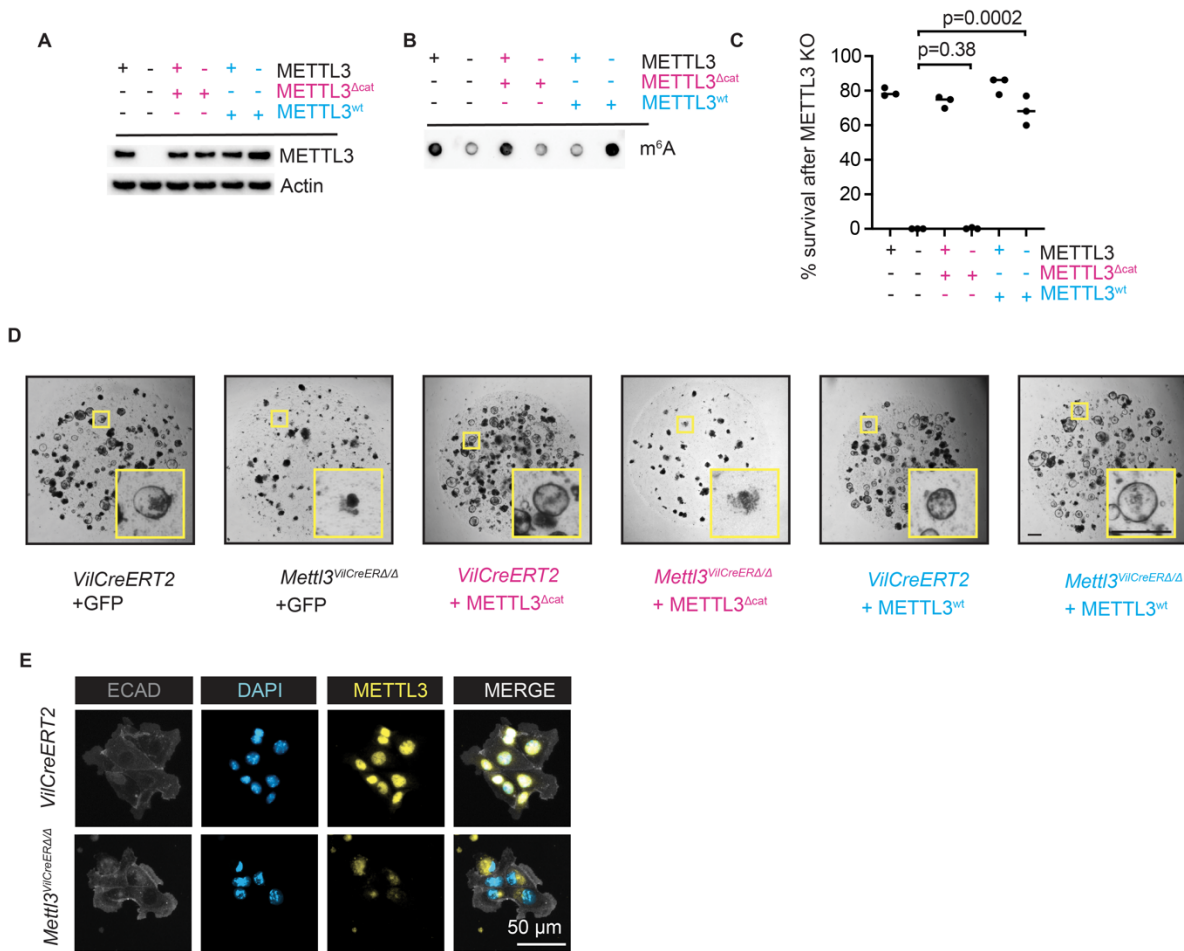

1010  
 1011 **Supplemental Figure 4. Catalytic inactive METTL3 does not rescue death of *Mettl3<sup>VilCreERΔ/Δ</sup>***  
 1012 **enteroids. (A)** Western for METTL3 two days post 4-OHT in *VilCreERT2* or *Mettl3<sup>VilCreERΔ/Δ</sup>* enteroids  
 1013 infected with lentivirus expressing either GFP, METTL3<sup>Δcat</sup>, or METTL3<sup>wt</sup>. **(B)** m<sup>6</sup>A dot blot three days post  
 1014 4-OHT in enteroid lines depicted in (A). Each dot is 60 ng isolated mRNA. **(C)** Percent surviving organoids  
 1015 five days post 4-OHT in enteroid lines depicted in (A). N=3 passage separated biological replicates are  
 1016 plotted with bar at media value, each biological replicate is comprised of three technical replicates. P value  
 1017 represents unpaired parametric Student's t-test **(D)** Representative images of enteroid appearance from  
 1018 data depicted in (C). Representative individual enteroids are highlighted in yellow insets. Scale bar 100 μM.  
 1019 **(E)** Whole mount staining of METTL3 in intestinal epithelial monolayers two days post 4-OHT treatment.  
 1020

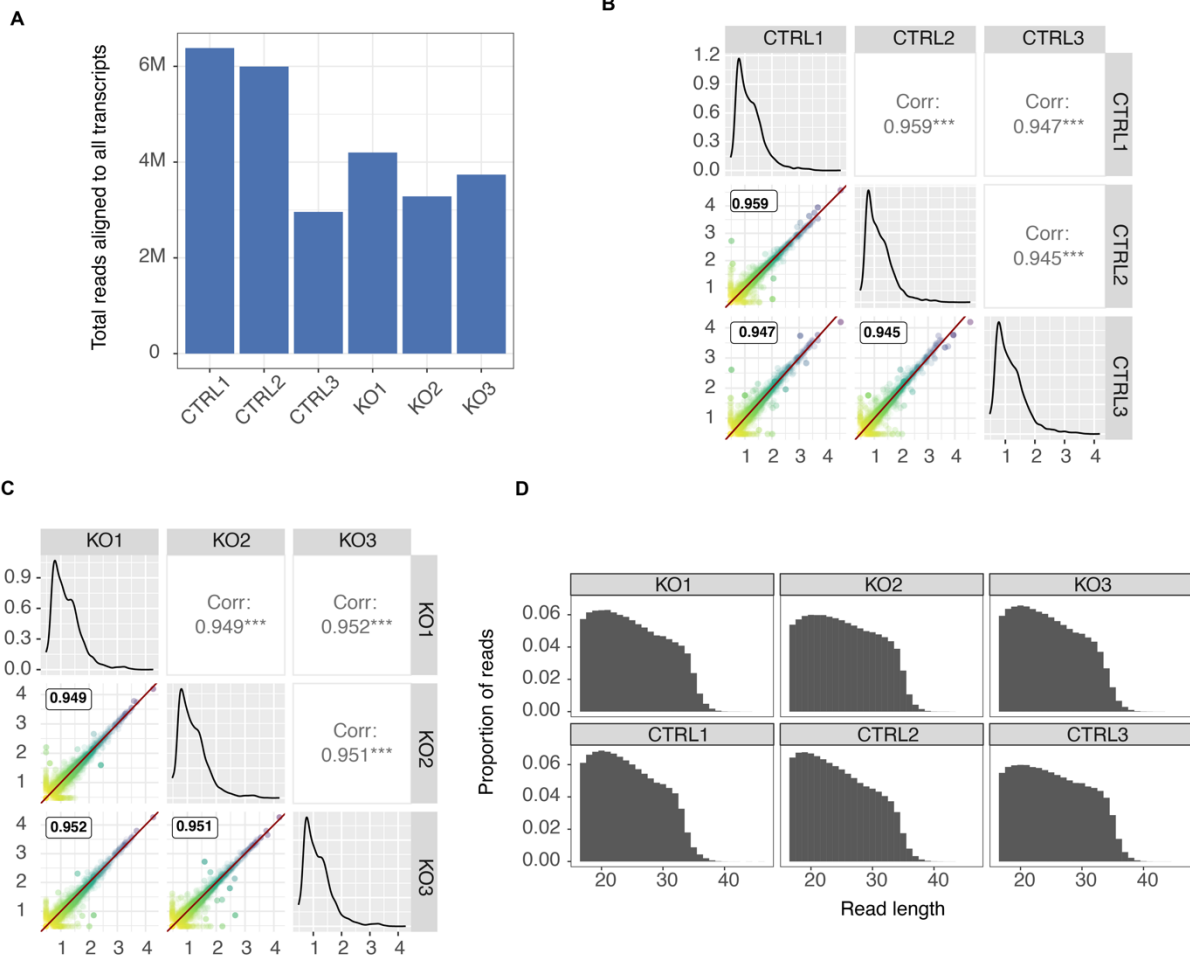

1021  
 1022  
 1023  
 1024  
 1025  
 1026

**Supplemental Figure 5. Quality control for the polysome sequencing. (A)** Read depth for all polysome profiling samples. **(B and C)** Correlation analysis for all (B) control samples and (C) METTL3 KO samples (C). **(D)** Distribution of read length for all polysome profiling samples.

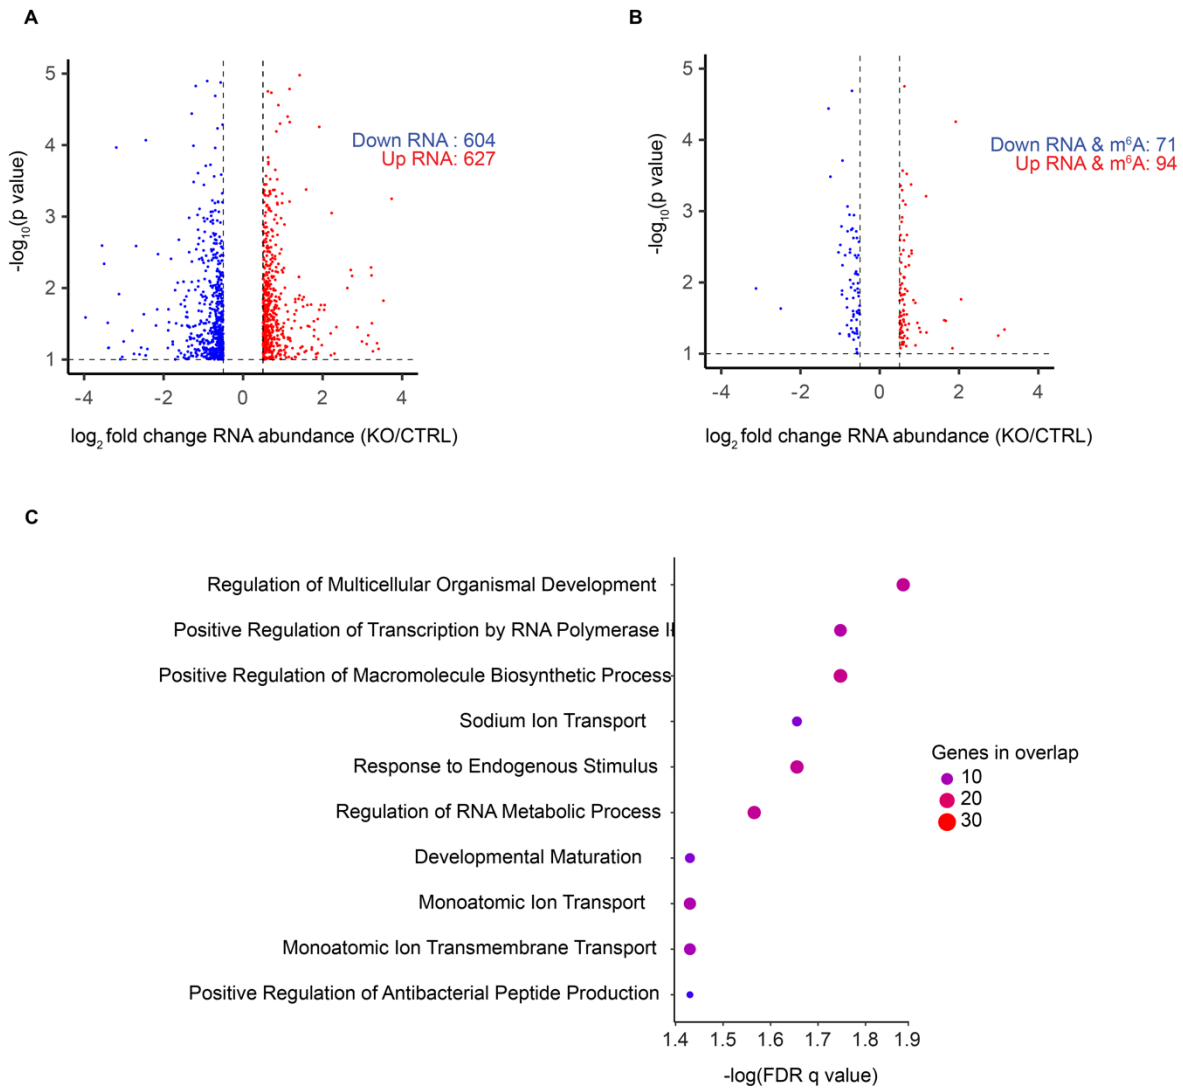

1027  
1028  
1029  
1030  
1031  
1032  
1033  
1034  
1035  
1036  
1037

**Supplemental Figure 6. Minimal changes in RNA abundance immediately following METTL3 deletion.** (A) Volcano plot of all transcripts with  $\log_2$  fold change in RNA abundance  $>0.5$  or  $<-0.5$  and  $-\log_{10}$  p value  $>1$ . Data for transcripts detected in RNA-seq of *Mettl3<sup>fllox/fllox</sup>* (CTRL) and *Mettl3<sup>VilCreERΔ/Δ</sup>* (KO) ileal enteroids 72 hours post initiation of 4-OHT treatment. Red marks all transcripts with significantly increased RNA abundance and blue marks all transcripts with significantly decreased RNA abundance. (B) Volcano plot of all transcripts displayed in (A), now filtered for transcripts containing at least one m<sup>6</sup>A peak. (C) Pathway enrichment analysis comparing transcripts with upregulated RNA abundance ( $\log_2FC < -1$ ) and at least one m<sup>6</sup>A peak against Gene Ontology Biological Process (GOBP) gene sets. Circle color and size both scale with number of genes overlapping between the tested gene set and the GOBP gene set.

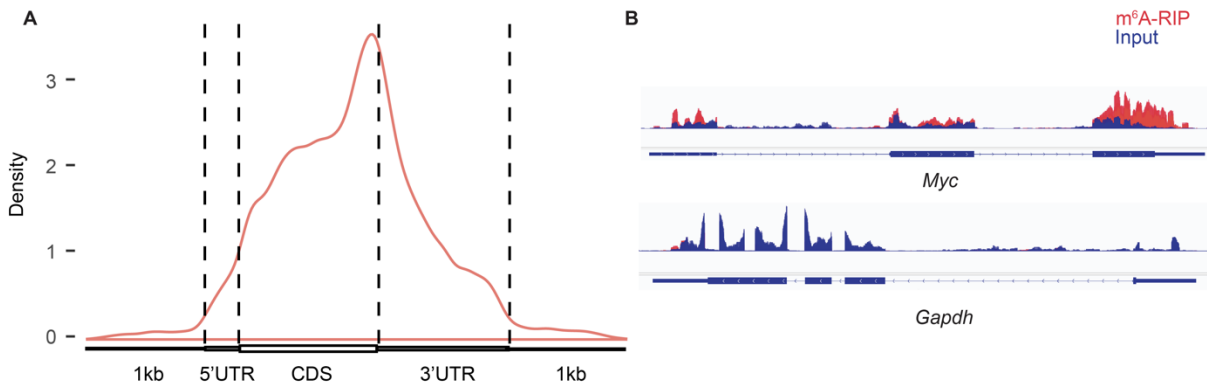

1038  
 1039  
 1040  
 1041  
 1042  
 1043  
 1044

**Supplemental Figure 7. Quality control for m<sup>6</sup>A-seq.** **(A)** Metagene density plot depicting distribution of m<sup>6</sup>A peaks called by Exomepeak2 within m<sup>6</sup>A-seq data from wildtype mouse small intestinal crypt epithelium. **(B)** m<sup>6</sup>A-seq read density (red) compared to input RNA read density (blue) for positive control (*Myc*) and negative control (*Gapdh*) transcripts as seen in Integrated Genomics Viewer.



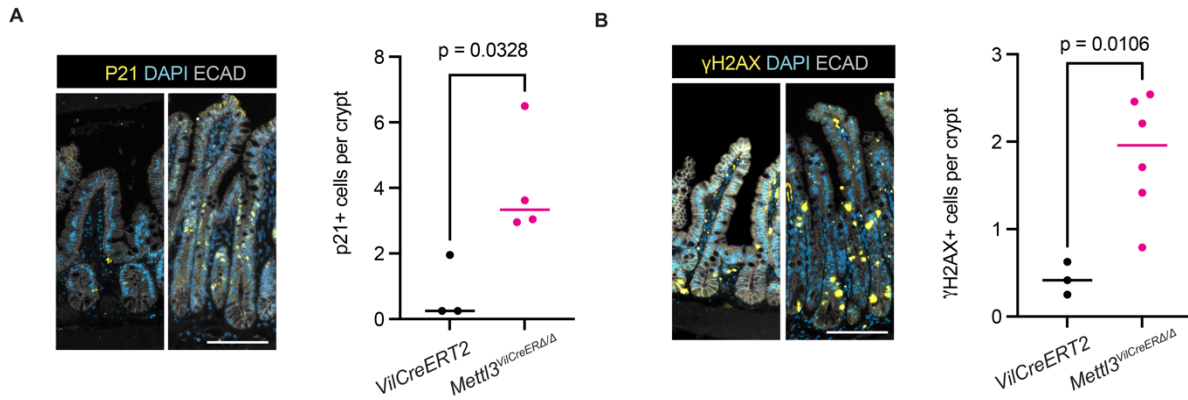

1045  
 1046  
 1047  
 1048  
 1049  
 1050  
 1051  
 1052  
 1053

**Supplemental Figure 8. Increases in senescence after METTL3 deletion are significant compared to Villin-CreERT2 controls. (A and B)** Representative images and quantification of p21 (n=3,4) and  $\gamma$ H2AX (n=3, 6) staining in distal half small intestine of Villin-CreERT2 and Mettl3<sup>VilCreERT2 $\Delta/\Delta$</sup>  mice two days post final tamoxifen injection. Values for Mettl3<sup>VilCreERT2 $\Delta/\Delta$</sup>  mice are the same used in Figure 7, I and J. Images and quantification from areas of most severe histological distortion in distal small intestine of mice two days post final tamoxifen injection. Each data point is the mean of three representative sections imaged per mouse with bar at median value and p denotes value of unpaired parametric Student's t test. Scale bars 100  $\mu$ M.

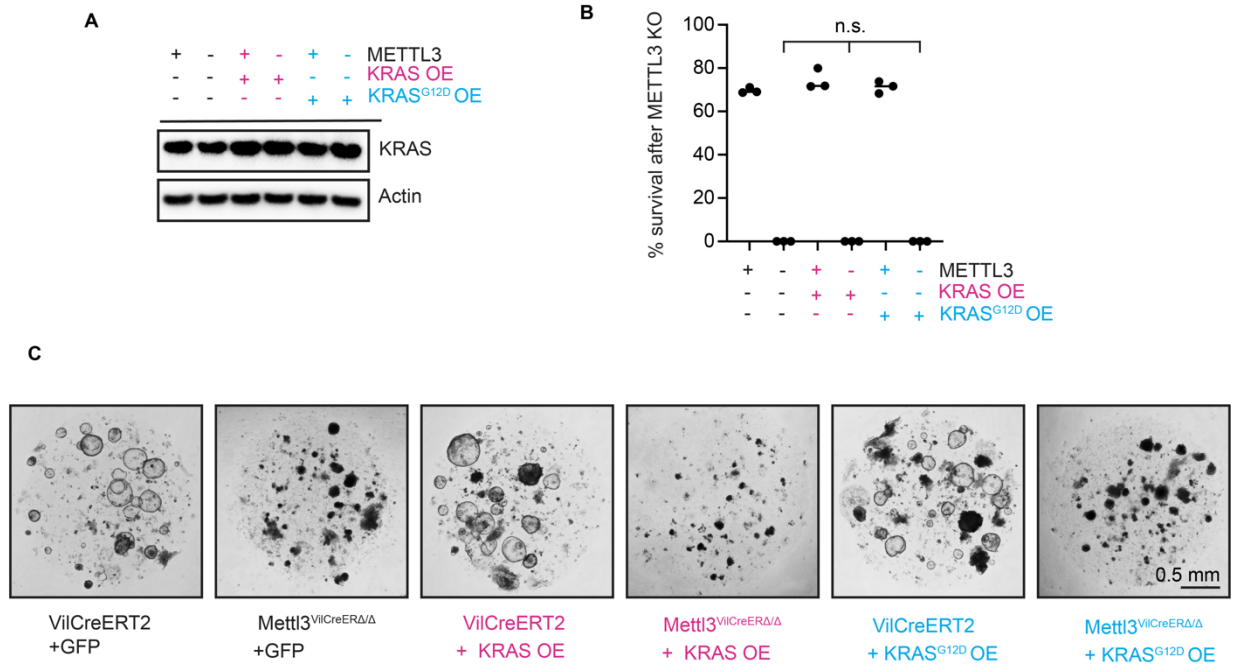

1054  
1055  
1056  
1057  
1058  
1059  
1060  
1061  
1062  
1063

**Supplemental Figure 9. KRAS overexpression does not rescue METTL3 KO enteroids. (A)** Western for KRAS in tamoxifen-naive enteroids infected with lentivirus expressing either GFP, KRAS, or KRAS<sup>G12D</sup>. **(B)** Percent surviving organoids five days post 4-OHT in enteroid lines depicted in (A). For all quantification, n=3 passage separated biological replicates are plotted with bar at media value, each biological replicate is comprised of 3 technical replicates. Non-significant findings determined using unpaired parametric Student's t-test, represents comparison between METTL3 KO enteroids and METTL3 KO enteroids expressing KRAS or KRAS<sup>G12D</sup>. **(C)** Representative images of enteroid appearance from data depicted in (B)

1064  
1065

**Supplemental Table 1.** Full list of primary and secondary antibodies used in this study.

| <b>Primary antibody- IF</b>                       | <b>Catalog number</b>  | <b>Antigen retrieval condition (if applicable)</b> |
|---------------------------------------------------|------------------------|----------------------------------------------------|
| Rabbit anti-METTL3                                | abcam ab195352         | Tris-EDTA pH 9.0                                   |
| Rabbit anti-p21                                   | Proteintech 28248-1-AP | Tris-EDTA pH 9.0                                   |
| Rabbit anti-Phosphorylated-Histone H2A.X (Ser139) | Cell Signaling 9718    | Tris-EDTA pH 9.0                                   |
| Rabbit anti-SP-1 Chromogranin A                   | Immunostar 20085       | Tris-EDTA pH 9.0                                   |
| Rabbit anti-LYZ1                                  | Dako A0099             | Citric Acid pH 6.0                                 |
| Rabbit anti-MUC2                                  | Genetex GTX100664      | Citric Acid pH 6.0                                 |
| Rabbit anti-Ki67                                  | abcam ab16667          | Citric Acid pH 6.0                                 |
| Rabbit anti-p-ERK                                 | Cell Signaling 4370    | Tris-EDTA pH 9.0                                   |
| Goat anti-E-Cadherin                              | R&D Systems AF748      | Either antigen retrieval method                    |
| Mouse anti-beta-Actin                             | Sigma A5316            |                                                    |
| Rabbit anti-METTL14                               | Sigma HPA038002        |                                                    |
| Rabbit anti-UBE1                                  | Proteintech 15912-1-AP |                                                    |
| Rabbit anti-SEC13                                 | Proteintech 15397-1-AP |                                                    |
| Mouse anti-c-Yes                                  | Santa Cruz sc-8403     |                                                    |
| Rabbit anti-KRAS                                  | Proteintech 12063-1-AP |                                                    |
| <b>Secondary antibody- IF</b>                     |                        |                                                    |
| Alexa Fluor 488 Anti-goat IgG                     | Jackson 805-545-180    |                                                    |
| Cy3 Anti-Rabbit IgG                               | Jackson 711-165-152    |                                                    |
| <b>Secondary antibody- Western</b>                |                        |                                                    |
| Anti-rabbit HRP                                   | Cell Signaling 7074    |                                                    |
| Anti-mouse HRP                                    | Novus NBP1-75249       |                                                    |

1066  
1067

1068 **Supplemental Table 2.** Histopathological scoring rubric adapted from (56) used for small intestine and  
 1069 colonic histopathological scoring, with scoring rules added for villus damage (villus damage only  
 1070 assessed in small intestine).  
 1071

| Feature graded          | Grade | Description                            |
|-------------------------|-------|----------------------------------------|
| Inflammation            | 0     | None                                   |
|                         | 1     | Slight                                 |
|                         | 2     | Moderate                               |
|                         | 3     | Severe                                 |
| Extent                  | 0     | None                                   |
|                         | 1     | Mucosa                                 |
|                         | 2     | Mucosa and submucosa                   |
|                         | 3     | Transmural                             |
| Regeneration            | 4     | No tissue repair                       |
|                         | 3     | Surface epithelium not intact          |
|                         | 2     | Regeneration with crypt depletion      |
|                         | 1     | Almost complete regeneration           |
|                         | 0     | Complete regeneration or normal tissue |
| Crypt damage            | 0     | None                                   |
|                         | 1     | Basal 1/3 damaged                      |
|                         | 2     | Basal 2/3 damaged                      |
|                         | 3     | Only surface epithelium intact         |
|                         | 4     | Entire crypt and epithelium lost       |
| Villus damage (SI only) | 0     | No change in villus height             |
|                         | 1     | 25% reduction in villus height         |
|                         | 2     | 50% reduction in villus height         |
|                         | 3     | 75% reduction in villus height         |
|                         | 4     | Complete loss of villus                |
| Percent involvement     | 1     | 1-25%                                  |
|                         | 2     | 26-50%                                 |
|                         | 3     | 51-75%                                 |
|                         | 4     | 76-100%                                |

1072  
1073

**Supplemental Table 3.** Full list of Taqman qPCR primers used in this study.

| <b>Gene</b>                                         | <b>Assay number</b> |
|-----------------------------------------------------|---------------------|
| <i>Actb</i>                                         | Mm02619580_g1       |
| <i>Olfm4</i>                                        | Mm01320260_m1       |
| <i>Bmi1</i>                                         | Mm03053308_g1       |
| <i>Clu</i>                                          | Mm01197002_m1       |
| <i>Lgr5</i>                                         | Mm00438890_m1       |
| <i>Ascl2</i>                                        | Mm01268891_g1       |
| <i>Cd44</i>                                         | Mm01277161_m1       |
| <i>Hopx</i>                                         | Mm00558630_m1       |
| <i>Kras</i> 3' UTR (also used for total transcript) | Mm00517494_m1       |
| <i>Kras</i> CDS exons 1-2                           | Mm00517492_m1       |
| <i>Kras</i> CDS exons 3-4A                          | Mm01255197_m1       |
| <i>Kras</i> 5' UTR                                  | Mm00517491_m1       |
| <i>Gapdh</i>                                        | Mm99999915_g1       |

1074  
1075

1076 **Supplemental Table 4.** Lentiviral transfer vector expression rates in all transgenic enteroid lines. All lines  
 1077 expressed GFP reporter to assess lentiviral infection rates. Expression rates determined by gating for  
 1078 DAPI- GFP+ single cells using flow cytometry.  
 1079  
 1080

| Vector                                                              | % GFP+ cells |
|---------------------------------------------------------------------|--------------|
| <i>VilCreERT2</i> + GFP                                             | 39.8%        |
| <i>Mettl3<sup>VilCreERT2/Δ</sup></i> + GFP                          | 69.8%        |
| <i>VilCreERT2</i> + <i>METTL3<sup>Δcat</sup></i>                    | 21.8%        |
| <i>Mettl3<sup>VilCreERT2/Δ</sup></i> + <i>METTL3<sup>Δcat</sup></i> | 34.8%        |
| <i>VilCreERT2</i> + <i>METTL3<sup>wt</sup></i>                      | 32.8%        |
| <i>Mettl3<sup>VilCreERT2/Δ</sup></i> + <i>METTL3<sup>wt</sup></i>   | 60.3%        |
| <i>VilCreERT2</i> + KRAS                                            | 47.5%        |
| <i>Mettl3<sup>VilCreERT2/Δ</sup></i> + KRAS                         | 39.7%        |
| <i>VilCreERT2</i> + KRAS <sup>G12D</sup>                            | 32.6%        |
| <i>Mettl3<sup>VilCreERT2/Δ</sup></i> + KRAS <sup>G12D</sup>         | 74.5%        |

1081

1082 **Supplemental Data 1. (separate file). Differential translation efficiency in METTL3 KO enteroids.**  
1083 Full results of RNA-seq and sequencing of polysome-bound RNAs from n=3 *Villin-CreERT2* (CTRL) and  
1084 n=3 *Mettl3<sup>VilCreERT2</sup>* (KO) enteroid biological replicates 72 hours after initiating 4-OHT treatment. Green  
1085 columns and blue columns display transcripts per million (TPM) values output by Kallisto in total RNA and  
1086 polysome-bound RNA fractions, respectively. Light orange columns correspond to translational efficiency  
1087 (TE) values for each transcript determined by dividing the TPM in the total RNA library by the TPM in the  
1088 polysome-bound RNA library for each individual transcript and sample. P value refers to the comparison  
1089 between mean TE of CTRL vs mean TE of KO replicates.

1090  
1091 **Supplemental Data 2. (separate file). Differential RNA abundance in METTL3 KO enteroids.** Results  
1092 of DESeq2 analysis of RNA-seq from n=3 *Villin-CreERT2* (CTRL) and n=3 *Mettl3<sup>VilCreERT2</sup>* (KO) enteroid  
1093 biological replicates 72 hours after initiating 4-OHT treatment.

1094  
1095 **Supplemental Data 3. (separate file). m6A-seq in wildtype mouse crypt epithelium.**  
1096 Full output of exomePeak2 analysis of m<sup>6</sup>A-sequencing data produced in epithelial cells sorted from distal  
1097 small intestinal crypts of n=3 adult wildtype mice.

1098  
1099  
1100

Lanes used in figure

Full unedited blot for Figure 5C

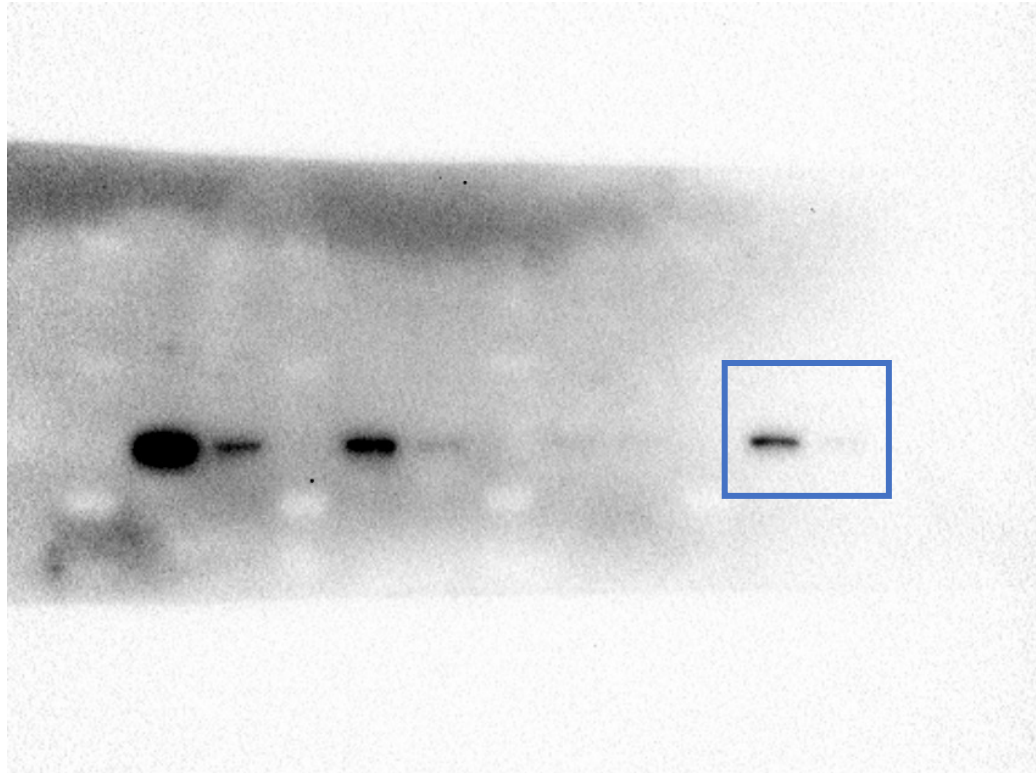

Anti-METTL3

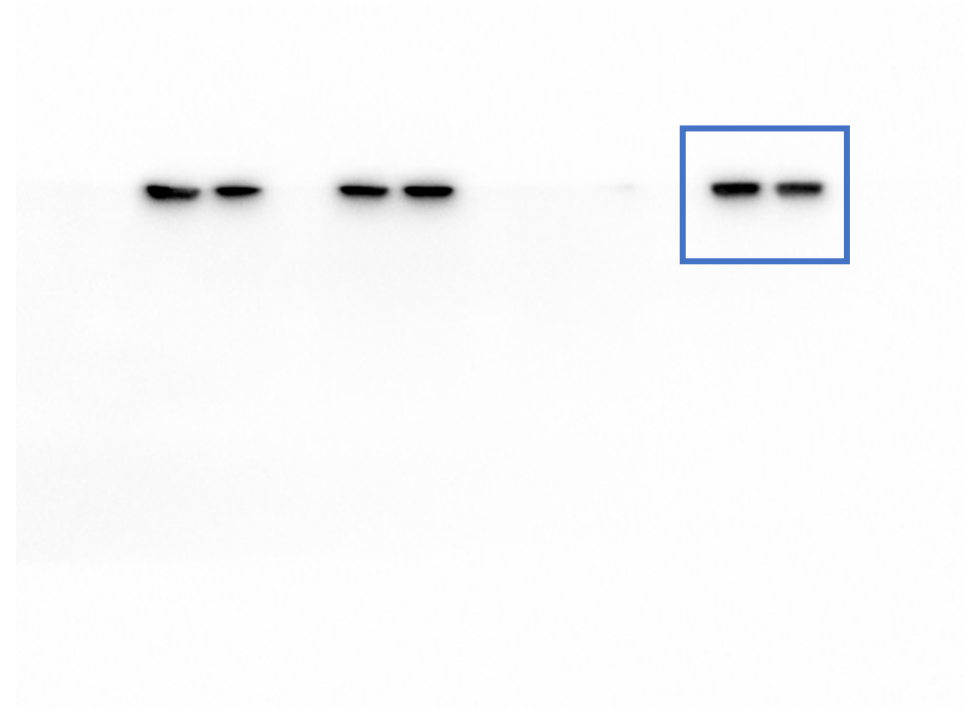

Anti-Actin



Full unedited blot for Figure 7G

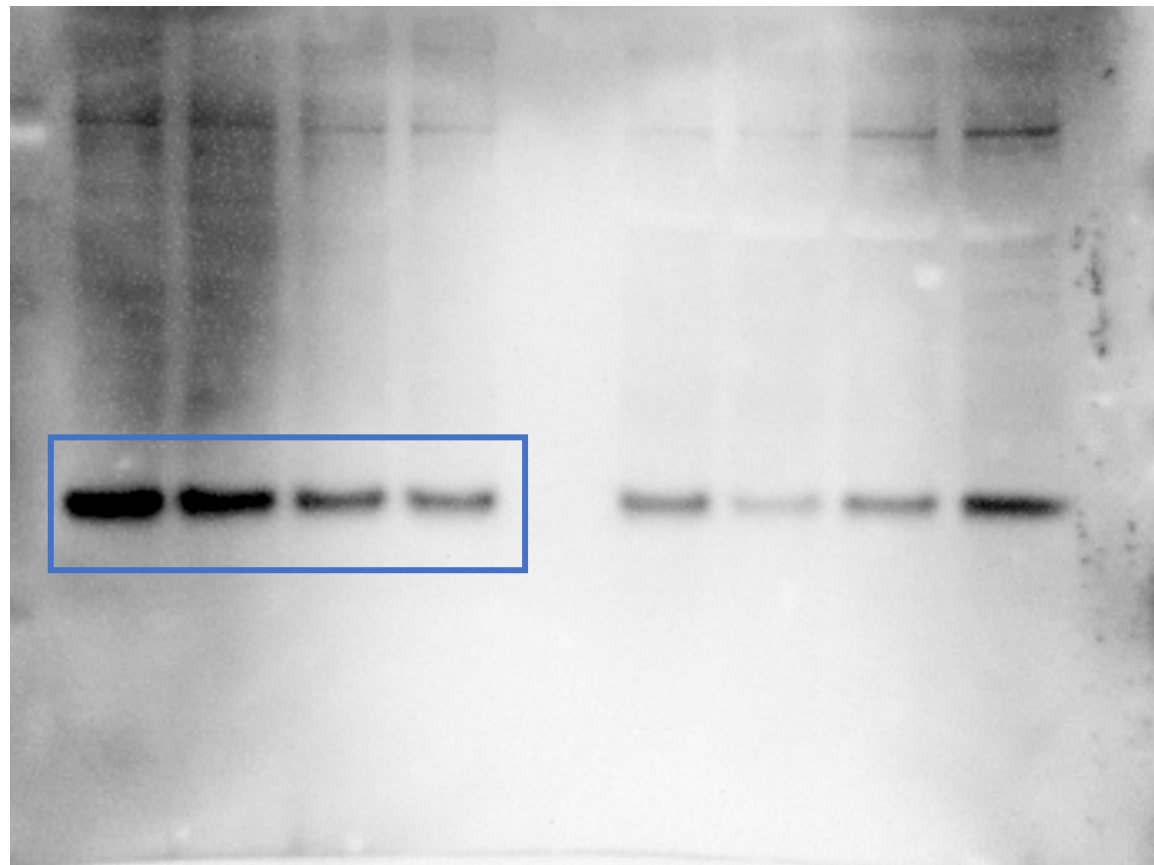

Anti-KRAS

Full unedited blot for Figure 7G

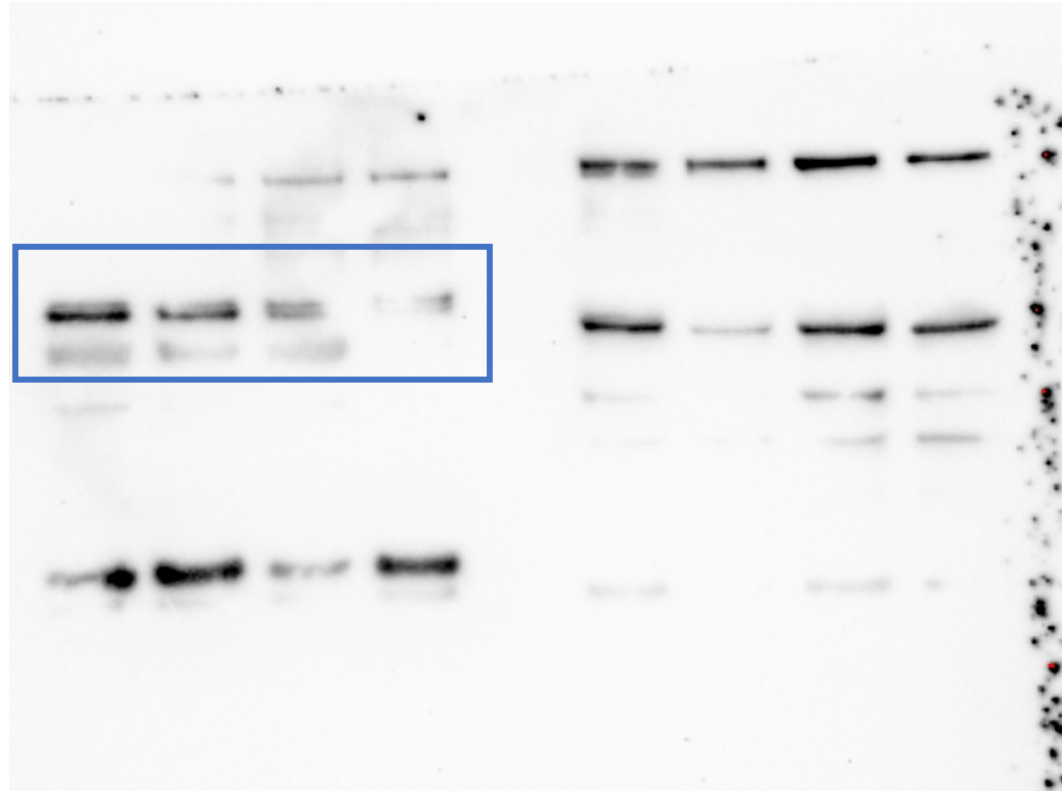

Anti-YES1

Full unedited blot for Figure 7G

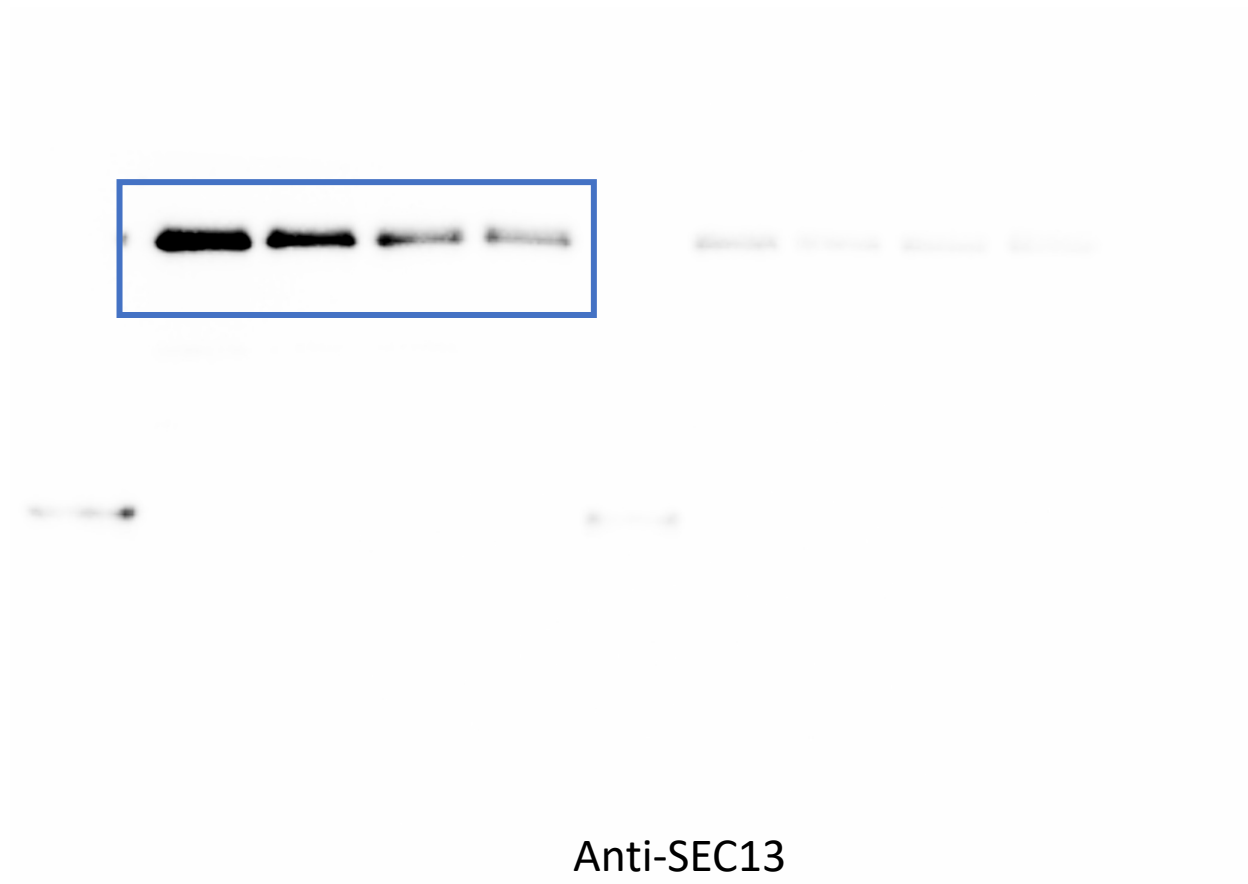

Full unedited blot for Figure 7G

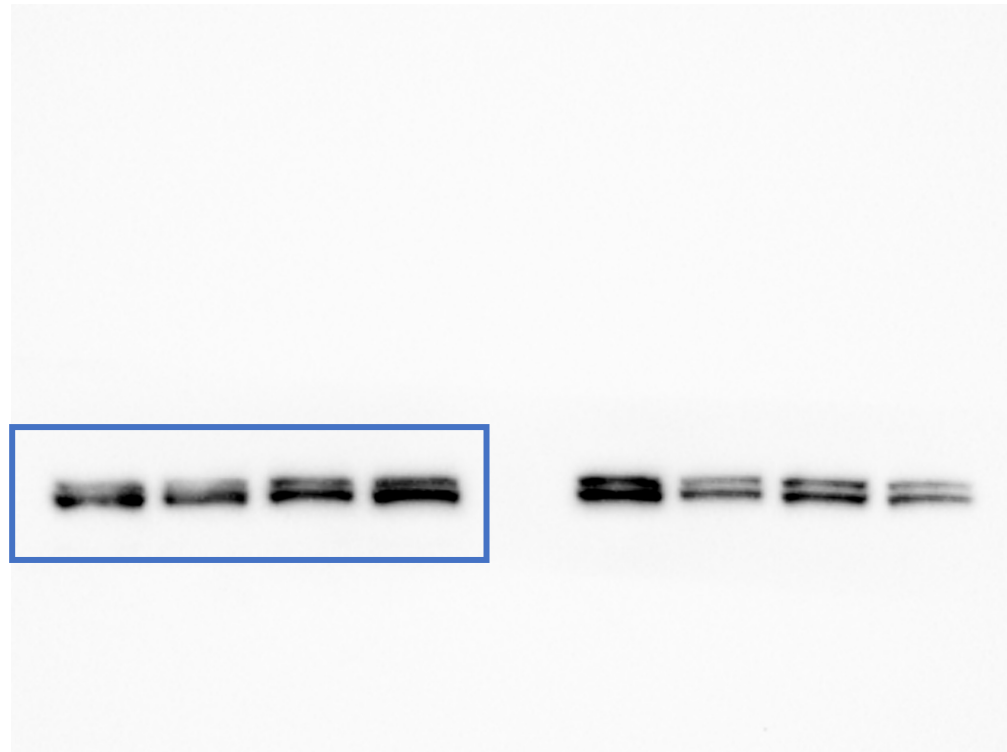

Anti-UBE1

Full unedited blot for Figure 7G

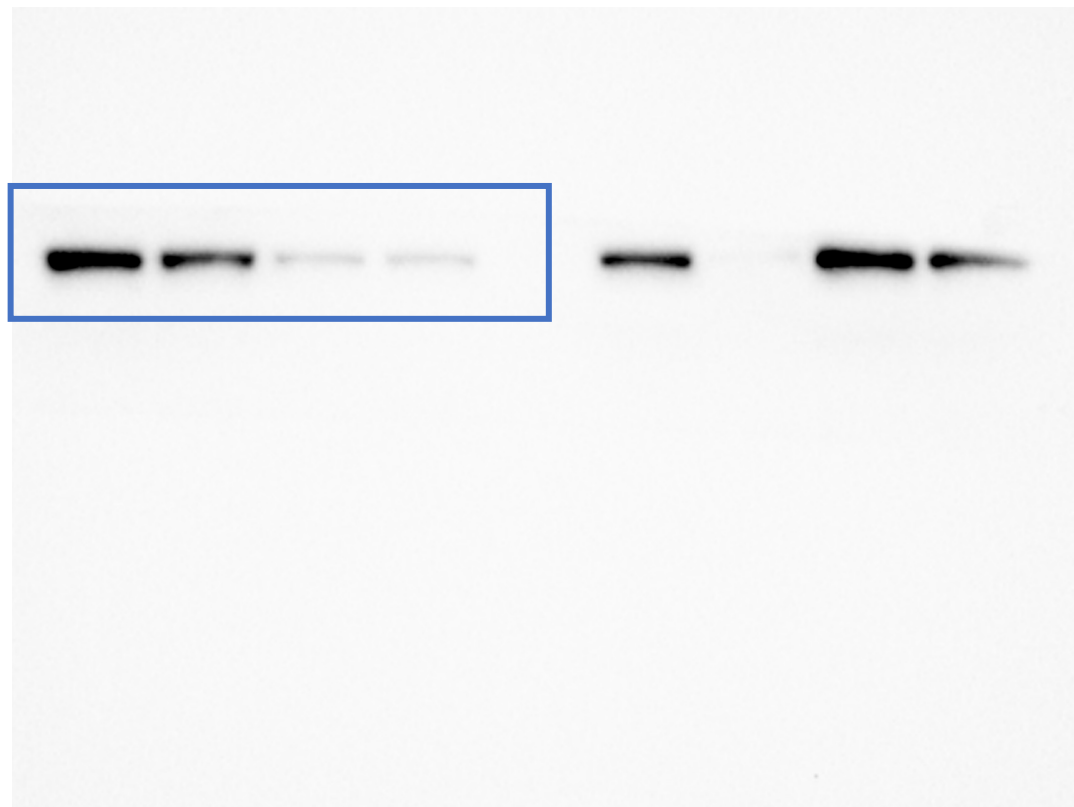

Anti-METTL3

Full unedited blot for Figure 7G

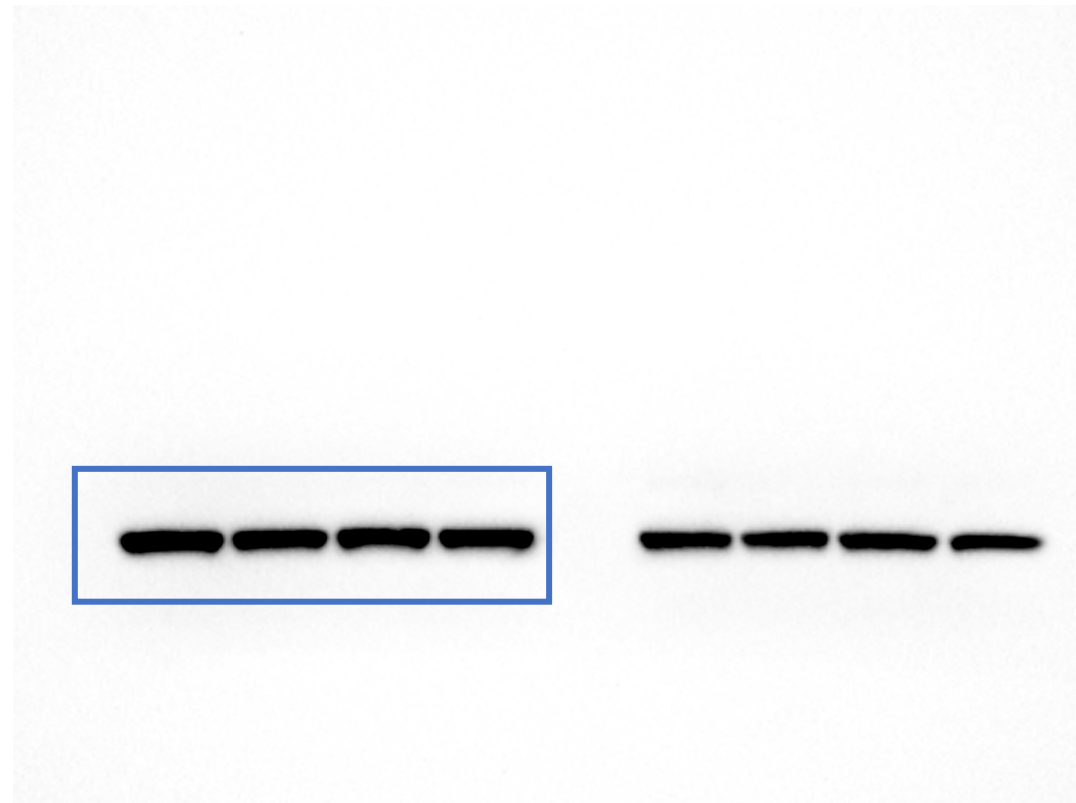

Anti-Actin

Full unedited blot for Supplemental Figure 1A (small intestine)

Anti-METTL3

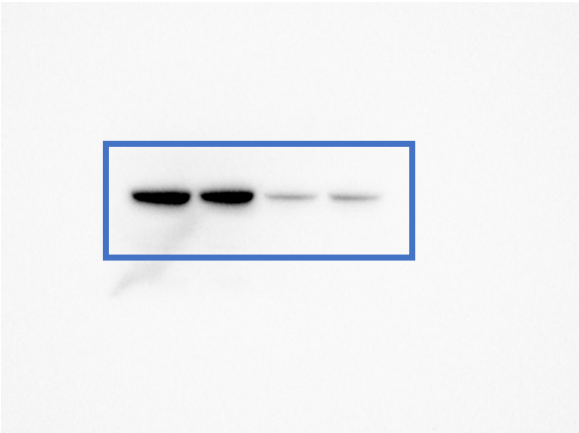

Anti-METTL14

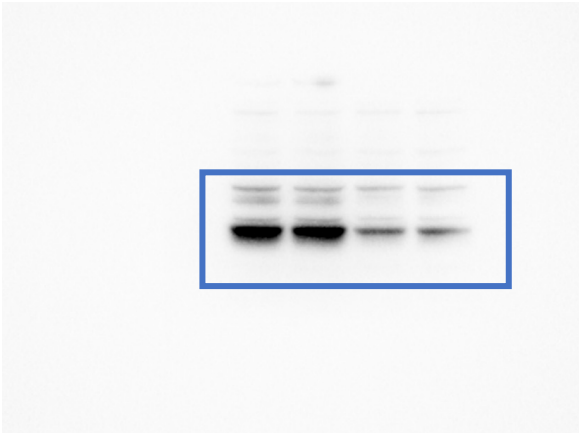

Anti-Actin

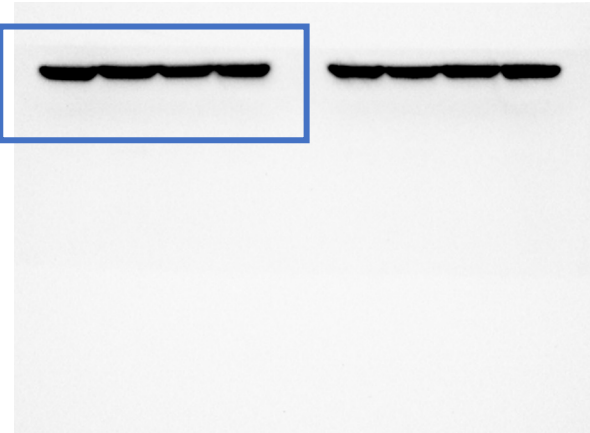

Small intestine

Full unedited blot for Supplemental Figure 1A (colon)

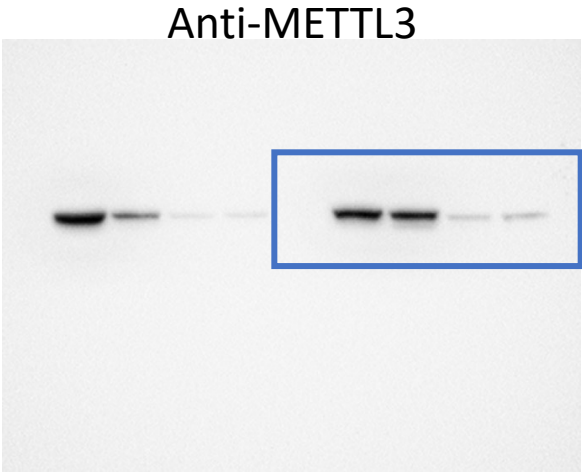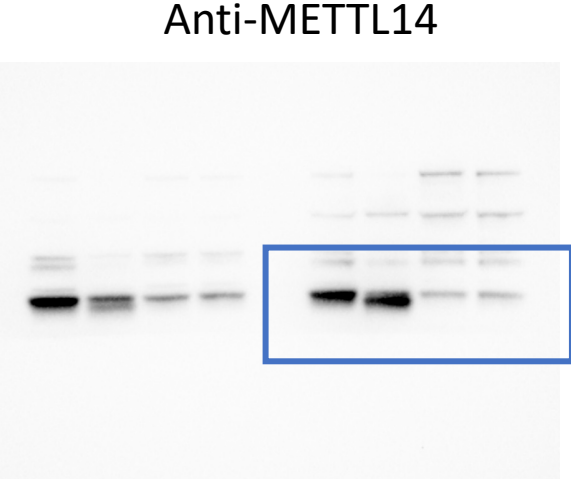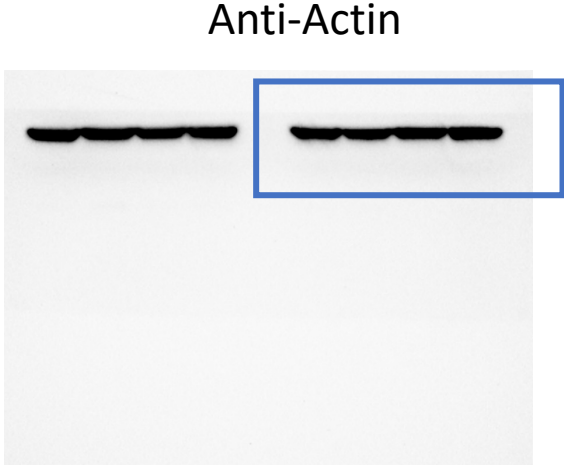

Colon



Full unedited blot for Supplemental Figure 1C

m<sup>6</sup>A

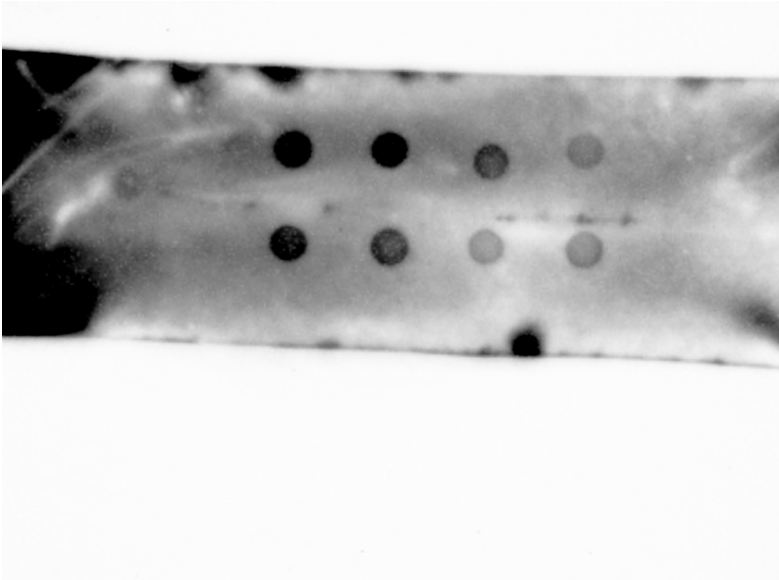

Small intestine  
Colon

Methylene blue

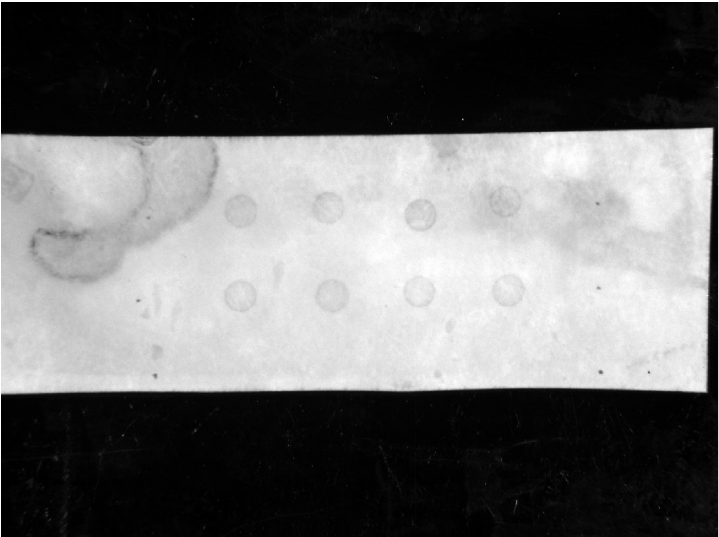

Small intestine  
Colon

Full unedited blot for Supplemental Figure 2A

Anti-METTL3

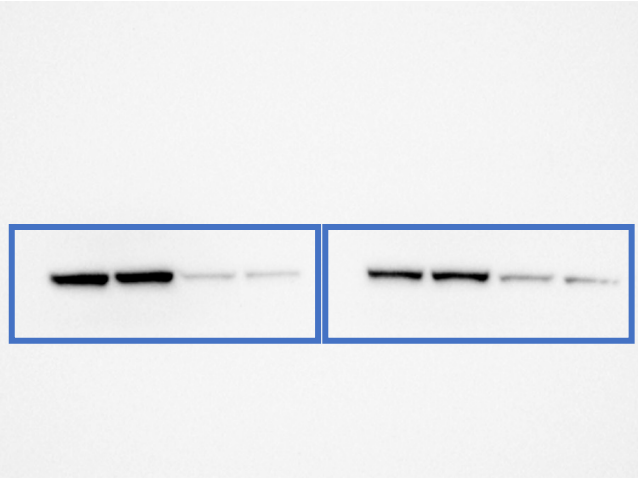

Small intestine

Colon

Anti-METTL14

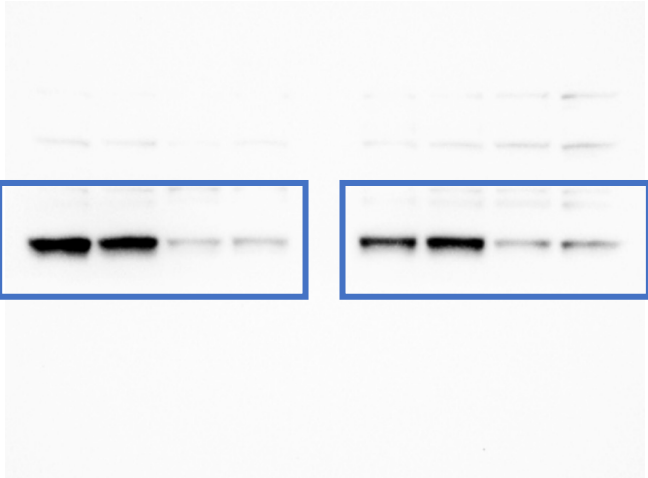

Small intestine

Colon

Anti-Actin

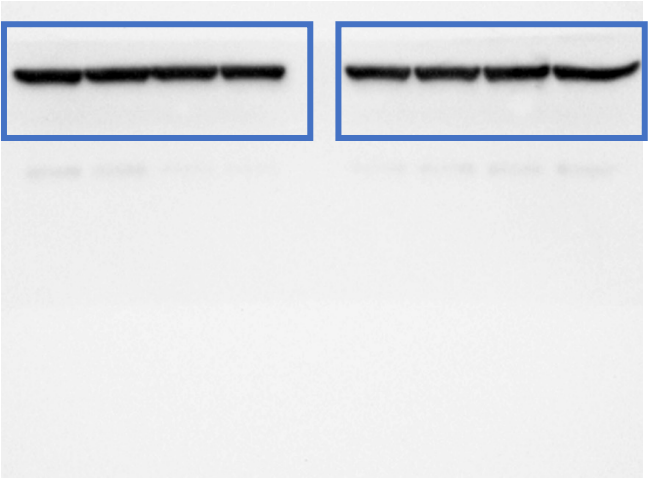

Small intestine

Colon

Full unedited blot for Supplemental Figure 4A

Anti-METTL3

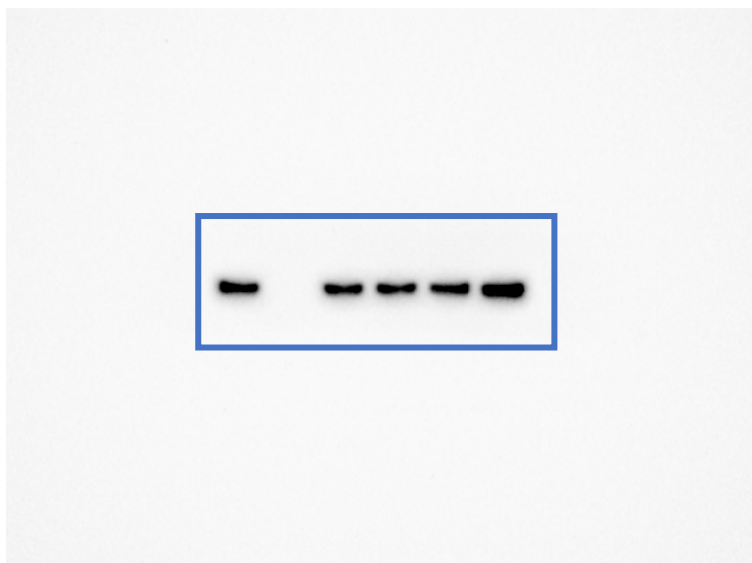

Anti-Actin

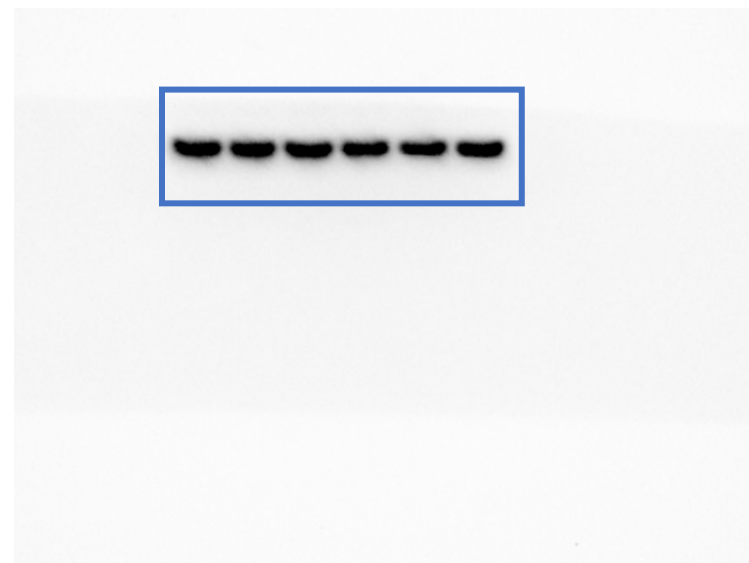

Full unedited blot for Supplemental Figure 4B

Anti-m<sup>6</sup>A

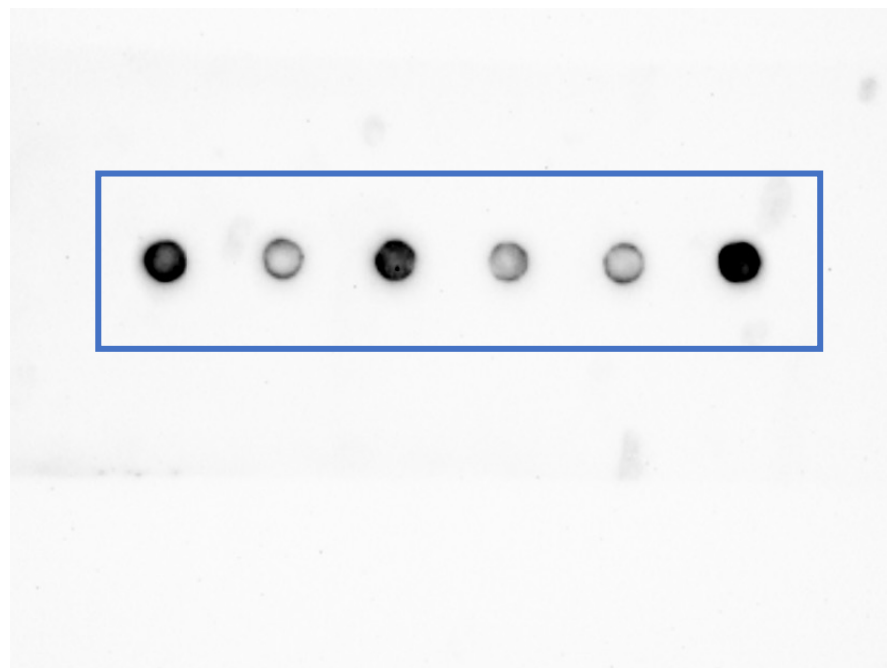

Full unedited blot for Supplemental Figure 9A

Anti-KRAS

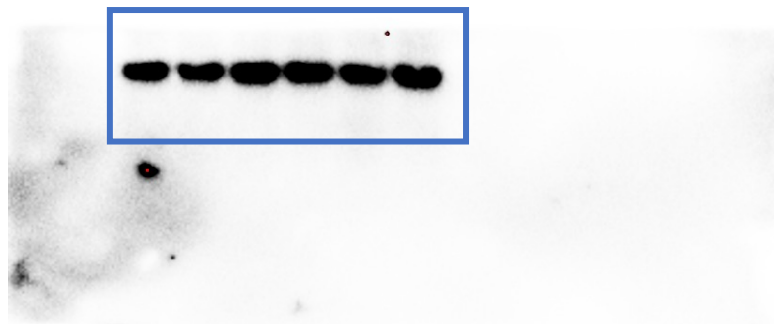

Anti-Actin

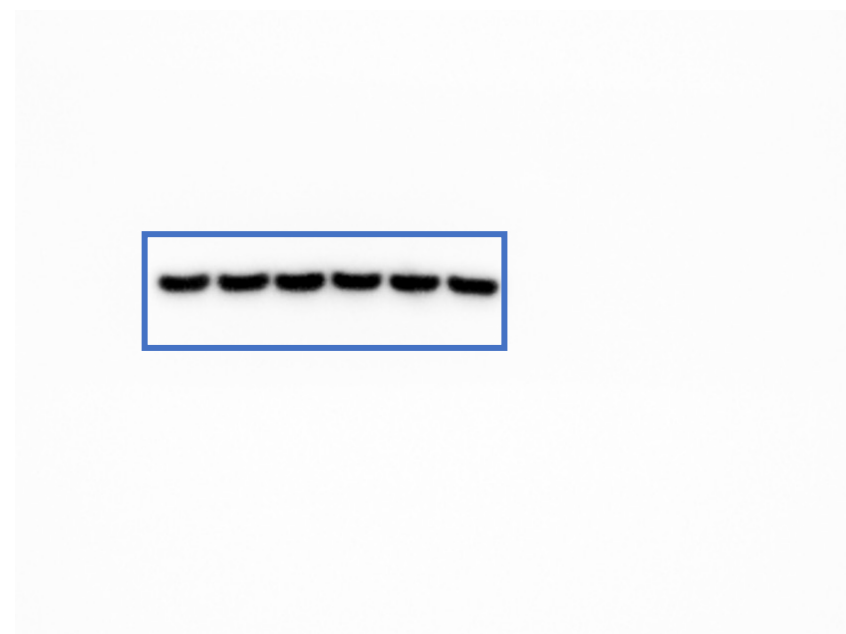

Supplement: sd1 [file 1]
