# Supplementary material for: Intestinal transit-amplifying cells require METTL3 for growth factor signaling and cell survival
Source: JCI journal article supplement (doi:10.1172/jci.insight.171657), 2023-10-26
Supplement: sd1 [file 1]

You are being redirected.
